# Supplementary material for: SIRT2‐knockdown rescues GARS‐induced Charcot‐Marie‐Tooth neuropathy
Source: PubMed Central journal article supplement (PMC8208790; doi:10.1111/acel.13391), 2021-05-30
Supplement: ACEL-20-e13391-s002.pdf [file ACEL-20-e13391-s002.pdf]

# Supplemental Figure 1

**A**

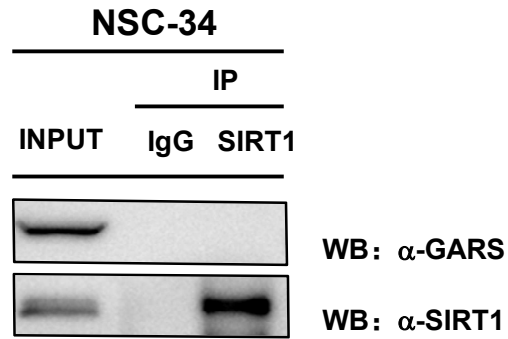

**C**

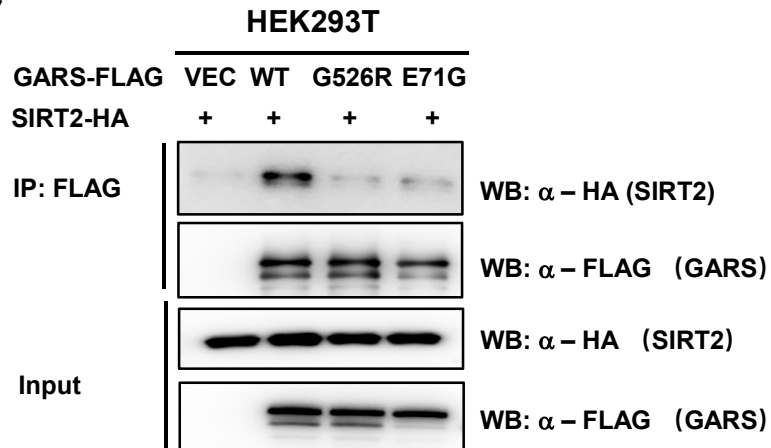

**B**

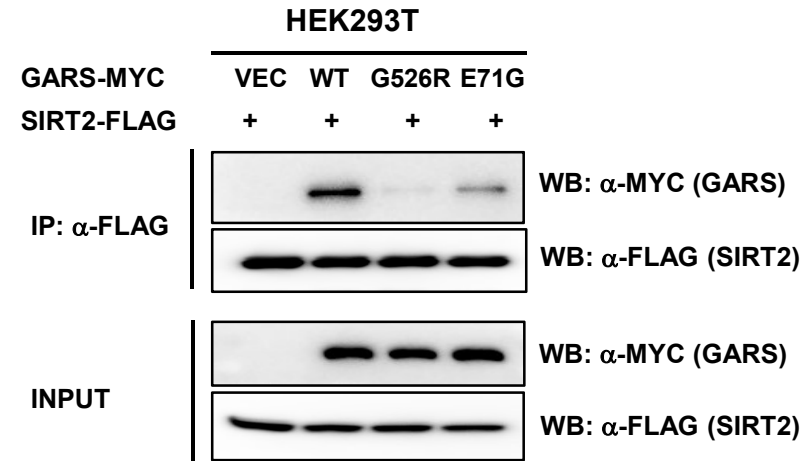

**D**

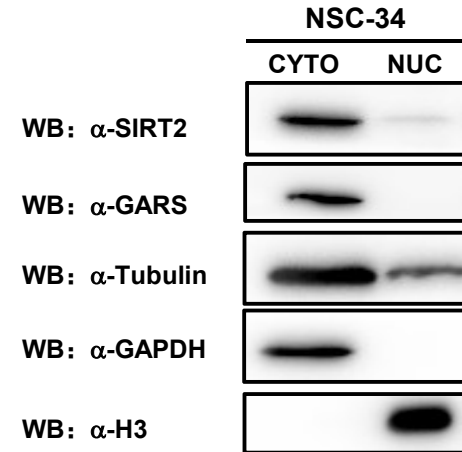

**E**

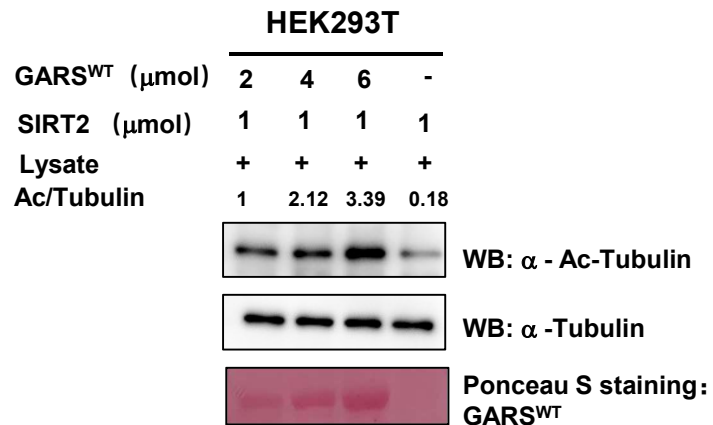

**F**

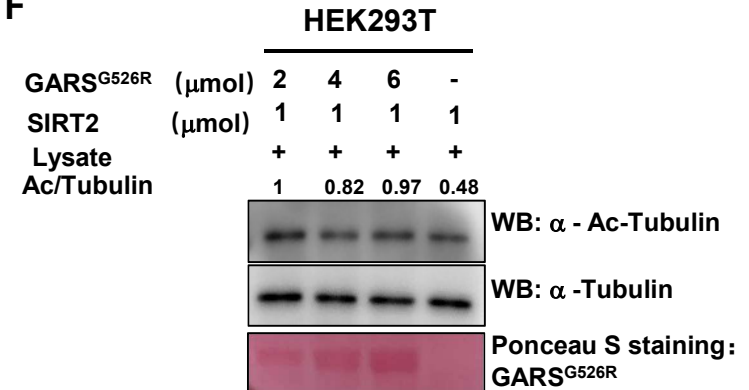

# Supplemental Figure 2

**A**

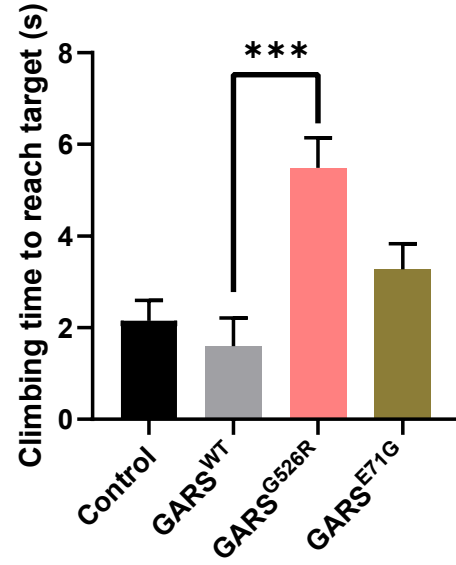

**B**

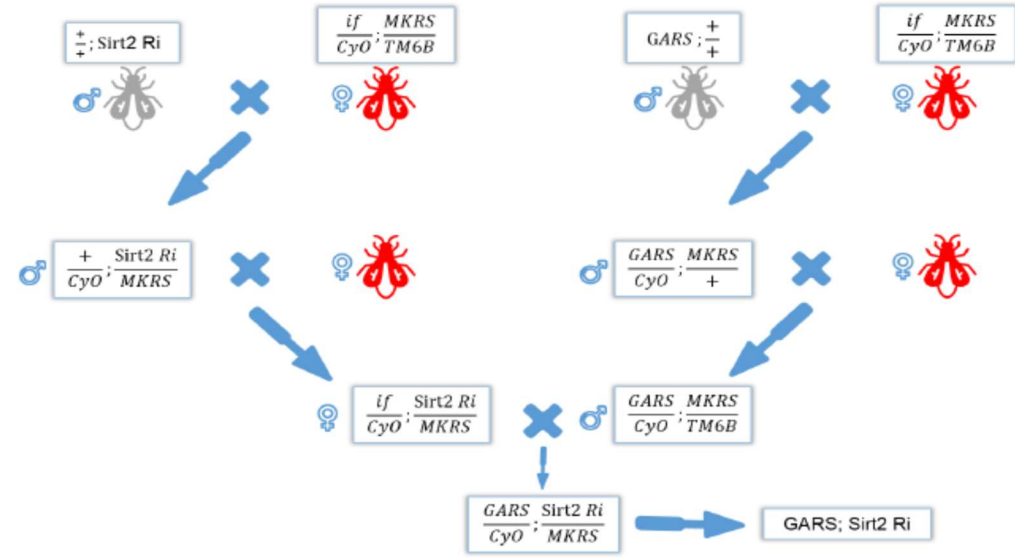

**C**

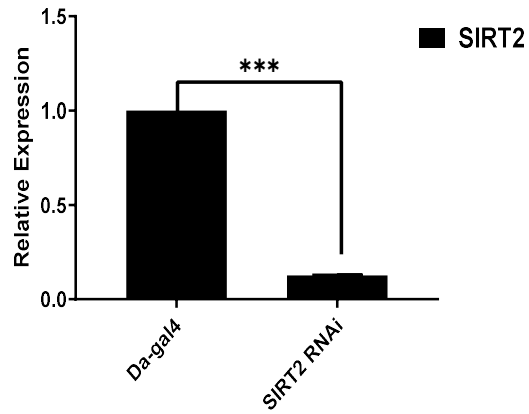

**D**

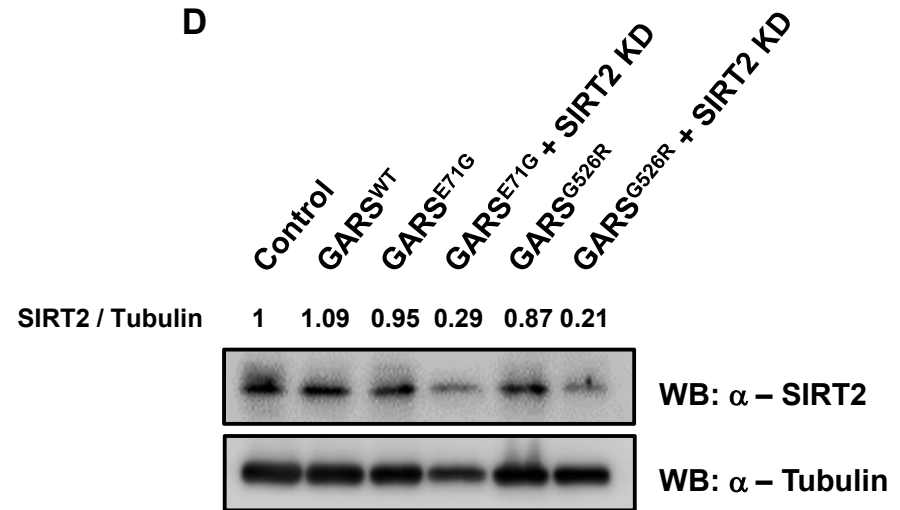

# Supplemental Figure 3

**A**

**L: WT**  
**M: GARS<sup>G526R</sup>+SIRT2 KD**  
**R: GARS<sup>G526R</sup>**

---

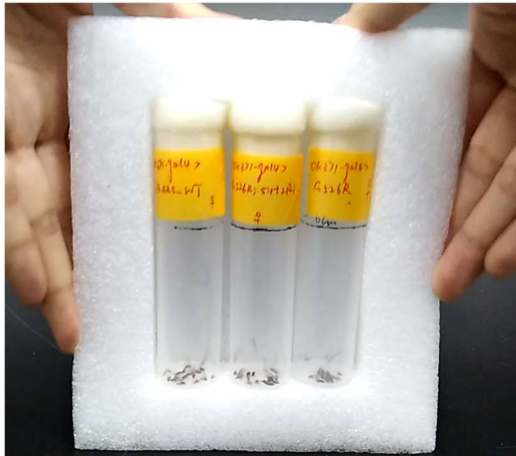

Day 10

**B**

**L: GARS<sup>G526R</sup>+AGK2**  
**M: GARS<sup>G526R</sup>+SIRT2 KD**  
**R: GARS<sup>G526R</sup>**

---

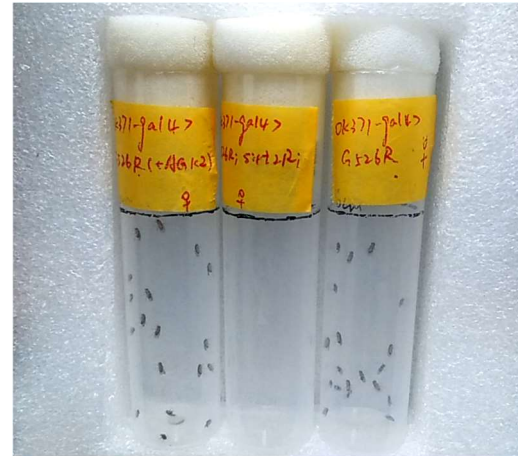

Day 10
